# Supplementary material for: Direct functionalisation of σ-aryl ligands: preparation of homoleptic functionalised aryls of osmium(iv)
Source: Royal Society of Chemistry journal article supplement (doi:10.1039/b104075h), 2001-01-01
Supplement: b104075h.doc [file b104075h.doc]

# *Supplementary Material*

**Direct functionalisation of **-aryl ligands: preparation of homoleptic functionalised aryls of osmium(IV)**

Man-Kit Lau,a Qian-Feng Zhang,a Joyce L. C. Chim,a Wing-Tak Wongb and

Wa-Hung Leung*a

*aDepartment of Chemistry, The Hong Kong University of Science and Technology, Clear Water Bay, Kowloon, Hong Kong, P. R. China*

*bDepartment of Chemistry, The University of Hong Kong Pokfulam Road,*

*Hong Kong, P. R. China*

## Preparations of osmium tetraaryl complexes

*To whom correspondence should be addressed. E-mail: chleung@ust.hk

# General.

Solvents were purified, dried and distilled prior to use. [OsO4] was obtained from Strem Ltd. C8H9MgBr (C8H9 = 2,5-dimethylphenyl) in Et2O were prepared from C7H8Br and Mg in thf. Spectrometers used were as follows: infrared spectra (in KBr discs) Perkin-Elmer 16 PC FT-IR; mass spectra on a Finnigan TSQ 7000; 300 MHz 1H NMR spectra Bruker ALX 300 (chemical shifts in ppm relative to SiMe4). Elemental analyses were performed by Medac Ltd, Surrey, UK.

**[Os(C8H9)4] 1.**

This was prepared as described elsewhere.[[1]](#footnote-2) To a solution of [OsO4] (0.5 g, 2.0 mmol) in Et2O (20 cm3) at ‑78C were added 7 equivalents of C8H9MgBr (11.5 cm3 of a 1.2 M solution in Et2O, 14 mmol) dropwise under nitrogen. The resulting reddish-brown mixture was warmed to room temperature, stirred for 2 h, and evaporated to dryness. The dark yellow sticky residue was extracted with CH2Cl2, filtered through a celite pad, and subjected to column chromatography (silica gel). Elution with hexane–Et2O (7:3) afforded **1** in 34% yield along with a small amount of [OsO(C8H9)4] (ca. 2%). 1H NMR (300 MHz, CDCl3): ** 2.22 (s, 12H, CH3), 2.27 (s, 12H, CH3), 6.57 (d, 4H, Hp), 6.68 (d, 4H, Hm), 6.70 (s, 4H, Ho). MS (FAB): *m/z* 612 (M+). *E*½ (CH2Cl2, V vs. Cp2Fe+/0): ‑1.48 [Os(IV/III)] and 0.24 [Os(V/IV)] (Calc. for C32H36Os: C 62.9, H 5.9. Found: C 63.0, H 6.0%).

**[Os(C8H8COCH3)3(C8H9)] 2 and [Os(C8H8COCH3)(C8H9)3]** **3**

To a solution of freshly sublimed Al2Cl6 (0.08 g, 0.6 mmol) and CH3COCl (0.04 cm3, 0.6 mmol) in CH2Cl2 (20 cm3) at –78C was added **1** (0.08 g, 0.15 mmol) under nitrogen and the reaction mixture was stirred for 1 h at that temperature. The mixture was warmed to room temperature and stirred for further 4 h and evaporated to dryness. The residue was washed with hexane (310 cm3), extracted with CH2Cl2 and purified by column chromatography (silica gel). Complexes **2** (40%) and **3** (30%) were eluted with CH2Cl2 and CH2Cl2–acetone (1:1), respectively, and recrystallised from CH2Cl2–hexane.

For **2**: 1H NMR (CDCl3): ** 2.24 (s, 3H, CH3), 2.27 (s, 3H, CH3), 2.30 (s, 9H, CH3), 2.43 (s, 9H, CH3), 2.57 (s, 9H, CO*CH3*), 6.70 (d, 3H, aryl H), 6.78 (s, 3H, aryl H), 7.13 (s, 3H, aryl H). IR (Nujol, cm-1): 1676 [(C=O)]. MS (FAB): *m/z* 738 (M+ +1) (Calc. for C38H42O3Os: C, 61.9; H, 5.7. Found: C, 60.8; H, 5.9%).

For **3**: 1H NMR (CDCl3): ** 2.24 (s, 9H, CH3), 2.26 (s, 9H, CH3), 2.30 (s, 3H, CH3), 2.42 (s, 3H, CH3), 2.56 (s, 3H, CO*CH3*), 6.61 (s, 1H, aryl H), 6.69 (d, 6H, aryl H), 6.77 (s, 1H, aryl H), 7.13 (s, 1H, aryl H). IR (KBr, cm-1): 1672 [(C=O)]. MS (FAB): *m/z* 654 (M+ +1) (Calc. for C34H38OOs: C, 62.8; H, 5.4. Found: C, 62.6; H, 6.2%).

**[Os(C8H8Br)4] 4**

To a solution of **1** (0.1 g, 0.16 mmol) in CH2Cl2 (20 cm3) were added 4 equivalents of pyridinium tribromide (0.2 g, 0.66 mmol) in MeOH (5 cm3) and Fe powder (4 mg). The reaction mixture was then stirred at room temperature for 1 h and water (20 cm3) was added. The purple organic layer was separated, washed with a saturated brine solution, and dried with MgSO4. The filtrate was concentrated and subjected to column chromatography (silica gel). The product was eluted with hexane and was further recrystallised from hexane **1** to give purple blocks, which were suitable for X-ray determination (yield: 40 mg, 52 %). 1H NMR (CDCl3): ** 2.20 (s, 12H, CH3), 2.26 (s, 12H, CH3), 6.65 (s, 4H, aryl H), 7.02 (s, 4H, aryl H). MS (FAB): *m/z* 926 (M+). *E*½ (CH2Cl2, V vs. Cp2Fe+/0): 0.45 [Os(V/IV)] (Calc. for C32H32Br4Os: C, 41.5; H, 3.5. Found: C, 41.7; H, 3.4%).

**[Os(C8H8-C6H4F)4] 5**

To a solution of **4** (100 mg, 0.1 mmol) in dmf (20 cm3) were added 4-fluorophenylboronic acid (90 mg, 0.64 mmol), K2CO3 (83 mg, 0.6 mmol) and [Pd(PPh3)4] (12 mg). The reaction mixture was stirred at 110oC up under N2 for 2 h and the solvent was removed by vacuum distillation. The residue was extracted with CH2Cl2, washed with water (3x20 cm3) and subjected to column chromatography (silica gel). The product was eluted with CH2Cl2-hexane (1:5) as a purple band and further recrystallised from hexane to give purple crystals (yield: 50 mg, 51 %). 1H NMR (CDCl3): ** 2.21 (s, 12H, CH3), 2.41 (s, 12H, CH3), 6.70 (s, 4H, aryl H), 6.87 (s, 4H, aryl H), 7.09 (dd, 8H, aryl H), 7.33 (dd, 8H, aryl H). 19F NMR (CDCl3): ** –73.0 (s). MS (FAB): *m/z* 988 (M++1) (Calc. for C56H48F4Os: C, 68.1; H, 4.9. Found: C, 68.1; H, 5.1%).

**[Os(C8H8–C6H4But)4] 6**

This was prepared similarly as for **5** using 4-*tert*-butylphenylboronic acid in place of 4-fluorophenylboronic acid (yield: 40%). 1H NMR (CDCl3): ** 1.38 (s, 36H, But), 2.24–2,42 (overlapping s, 24H, CH3), 7.32 (d, 8H, aryl H), 7.42 (d, 8H, aryl H), 7.46–7.60 (m, 8H, aryl H). MS (FAB): *m*/*z* 1140 (M+) (Calc. for C72H84Os: C, 75.9; H, 7.4. Found: C, 76.0; H, 7.6%).

**[Os(C8H8Br)3{C8H8Pd(PPh3)2Br}] 7**

To a solution of **4** (0.1 g, 0.16 mmol) in dmf (20 cm3) was added one equivalent of [Pd(PPh3)4] ( 0.19 g, 0.16 mmol) and the reaction mixture was stirred at 110oC for 1 hour. The solvent was removed by vacuum distillation and residue was subjected to column chromatography (silica gel) using CH2Cl2 as eluant. Recrystallisation from CH2Cl2–hexane gave a purple crystalline solid (yield: 80 mg, 32 %) 1H NMR (CDCl3):  2.13 – 2.25 (overlapping s, 12H, CH3), 2.28 – 2.36 (overlapping s, 12H, CH3), 6.66 – 6.68 (m, 4H, aryl H), 6.83 – 6.85 (m, 4H, aryl H), 7.27 – 7.34 (m, 30H, PPh3). 31P {1H} NMR (CDCl3): ** 22.5 (s). MS (FAB): *m/z* 1557 (M+) (Calc. for C68H62Br4P2PdOs: C, 52.4; H, 4.0. Found: C, 53.2; H, 4.2%).

**[Os(C8H8–C6H4NH2)4] 8**

To a solution of **4** (100 mg, 0.1 mmol) in dmf (20 cm3) were added 3-aminophenylboronic acid (80 mg, 0.86 mmol), K2CO3 (83 mg) and [Pd(PPh3)4] (10 mg), and the resulting mixture was heated at 110oC for 2 h. The volatiles were removed and the residue was subjected to column chromatography (silica) using CH2Cl2/acetone (7:3) as eluant (yield: 60 mg, 60% yield). 1H NMR (CDCl3): ** 2.23 (s, 12H, CH3), 2.39 (s, 12H, CH3), 3.70 (s br., 8H, NH2), 6.62 (d, 4H, aryl H), 6.70 (s, 8H, aryl H), 6.78 (d, 4H, aryl H), 6.85 (s, 4H, aryl H), 7.19 (t, 4H, aryl H). MS (FAB): *m/z* 975 (M+). IR (KBr, cm–1): 3412 br. [(N–H)]. (Calc. for C56H56N4Os: C, 69.0; H, 5.8; N, 5.7. Found: C, 69.2; H, 6.0; N, 4.8%). Despite several attempts, good nitrogen analysis was not obtained possibly due to contamination of some amine impurities present in the samples.

**[Os(C8H8-C6H4CO2H)4] 9**

To a solution of **4** (100 mg, 0.1 mmol) in dmf (20 cm3) were added 4-carboxyphenylboronic acid (100 mg, 0.6 mmol), K2CO3 (83 mg, 0.6 mmol) and [Pd(PPh3)4] (10 mg), and the resulting mixture was stirred at 110oC for 2 h. The volatiles were removed in vacuo and the residue was dissolved in 1M NaOH(*aq*). To the filtrate was added 1M HCl(*aq*) until a purple precipitate formed. The product was collected, dried and recrystallised from diethyl ether and dried in vacuo (yield: 70 mg, 64 %). 1H NMR (CDCl3): ** 2.15 (s, 12H, CH3), 2.41 (s, 12H, CH3), 6.78 (s, 4H, aryl H), 6.91 (s, 4H, aryl H), 7.48 (d, 8H, aryl H), 8.07 (d, 8H, aryl H), 9.86 (s br., 4H, CO2*H*). IR (KBr, cm–1): 1692 [**(C=O)]. MS (FAB): *m/z* 1092 (M++1) (Calc. for C60H52O8Os: C, 64.9; H, 4.9. Found: C, 64.2; H, 4.8%).

1. M.-K. Lau, J. L. C. Chim, I. D. Williams, W.-T. Wong and W.-H. Leung, *Can. J. Chem*., 2001, 79, xx. [↑](#footnote-ref-2)
